# Supplementary material for: Genetic variants in histone modification regions are associated with the prognosis of lung adenocarcinoma
Source: Springer Nature journal article supplement (doi:10.1038/s41598-021-00909-z), 2021-11-02
Supplement: 41598_2021_909_MOESM1_ESM.pdf [file 41598_2021_909_MOESM1_ESM.pdf]

## **Genetic variants in histone modification regions are associated with the prognosis of lung adenocarcinoma**

Hyo-Gyoung Kang<sup>1,2,\*</sup>, Yong Hoon Lee<sup>3,\*</sup>, Shin Yup Lee<sup>3,4</sup>, Jin Eun Choi<sup>1,2</sup>, Sook Kyung Do<sup>1,2</sup>, Mi Jeong Hong<sup>1,2</sup>, Jang Hyuck Lee<sup>1,5</sup>, Ji Yun Jeong<sup>6</sup>, Young Woo Do<sup>4,7</sup>, Eung Bae Lee<sup>4,7</sup>, Kyung Min Shin<sup>8</sup>, Won Kee Lee<sup>9,10</sup>, Sun Ha Choi<sup>3,4</sup>, Hye won Seo<sup>3</sup>, Seung Soo Yoo<sup>3,4</sup>, Jaehye Lee<sup>3</sup>, Seung Ick Cha<sup>3</sup>, Chang Ho Kim<sup>3</sup>, Sukki Cho<sup>11</sup>, Sanghoon Jheon<sup>11</sup>, Jae Yong Park<sup>1,2,3,4,5</sup>

\*These authors contributed equally to this work.

### Corresponding authors

Jae Yong Park, MD, PhD, Lung Cancer Center, Kyungpook National University Chilgok Hospital, 807, Hoguk-ro, Buk-gu, Daegu 41404, Korea; Tel: +82-53-200-2631; Fax: +82-53-200-2027, E-mail: [jaeyong@knu.ac.kr](mailto:jaeyong@knu.ac.kr)

Shin Yup Lee, MD, PhD, Lung Cancer Center, Kyungpook National University Chilgok Hospital, 807, Hoguk-ro, Buk-gu, Daegu 41404, Korea; Tel: +82-53-200-2632; Fax: +82-53-200-2027, E-mail: [shinyup@knu.ac.kr](mailto:shinyup@knu.ac.kr)

## **Supplementary Information**

Supplementary Figure S1, Supplementary Table S1, S2 and S3

A.

| rs17583   | Score |
|-----------|-------|
| GGCCATCGC | 14.3  |
| GGCCATTGC | 11.7  |

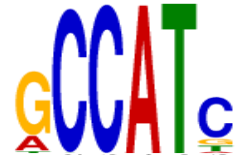

YY1 motif

B.

| rs4751162 | Score |
|-----------|-------|
| CAAGTGTAG | -4.4  |
| CAGGTGTAG | 7.6   |

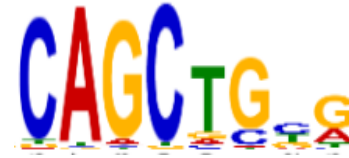

TFAP4 motif

Supplementary Figure S1. Matched motifs of YY1 and TFAP4, and the predicted binding scores of rs17583 and rs4751162. The rs17583 and rs4751162 are located in the binding motifs of YY1 and TFAP4, respectively. Predicted binding scores using the HaploReg database\*

\*Lucas D Ward, Manolis Kellis. HaploReg: a resource for exploring chromatin states, conservation, and regulatory motif alterations within sets of genetically linked variants. *Nucleic Acids Res.* 2012;40:D930-4.

Supplementary Table S1. List of genotyped SNPs and analysis for overall survival and disease-free survival in the discovery study.

| Polymorphism/Gene <sup>a</sup> |         |          | Genotype |               | Overall survival, <i>P</i> -value <sup>b</sup> |           |            | Disease Free survival, <i>P</i> -value <sup>b</sup> |           |            |
|--------------------------------|---------|----------|----------|---------------|------------------------------------------------|-----------|------------|-----------------------------------------------------|-----------|------------|
| ID No.                         | Alleles | Location | MAF      | HWE- <i>p</i> | Dominant                                       | Recessive | Codominant | Dominant                                            | Recessive | Codominant |
| rs17583                        | C>T     | O        | 0.34     | 0.53          | 0.001                                          | 0.96      | 0.02       | 0.15                                                | 0.24      | 0.09       |
| rs4751162                      | A>G     | C        | 0.16     | 0.47          | 0.23                                           | 0.56      | 0.21       | 0.04                                                | 0.92      | 0.06       |
| rs1529959                      | G>A     | O        | 0.49     | 0.58          | 0.06                                           | 0.71      | 0.34       | 0.03                                                | 0.61      | 0.33       |
| rs2601006                      | C>T     | O        | 0.26     | 0.24          | 0.75                                           | 0.10      | 0.30       | 0.65                                                | 0.02      | 0.15       |
| rs757228                       | G>A     | O        | 0.36     | 0.45          | 0.11                                           | 0.94      | 0.21       | 0.03                                                | 0.67      | 0.07       |
| rs11188272                     | G>C     | C        | 0.39     | 0.18          | 0.23                                           | 0.03      | 0.83       | 0.71                                                | 0.002     | 0.19       |
| rs4669                         | T>C     | O        | 0.39     | 0.05          | 0.03                                           | 0.69      | 0.19       | 0.07                                                | 0.39      | 0.45       |
| rs6049283                      | A>C     | O        | 0.21     | 0.07          | 0.04                                           | 0.19      | 0.19       | 0.46                                                | 0.11      | 0.99       |
| rs1205366                      | C>T     | O        | 0.15     | 0.38          | 0.03                                           | 0.88      | 0.05       | 0.16                                                | 0.28      | 0.11       |
| rs17528989                     | G>A     | C        | 0.14     | 0.07          | 0.89                                           | 0.20      | 0.60       | 0.47                                                | 0.01      | 0.15       |
| rs2425047                      | A>C     | O        | 0.19     | 0.28          | 0.78                                           | 0.02      | 0.56       | 0.87                                                | 0.16      | 0.75       |
| rs1136267                      | C>A     | O        | 0.21     | 0.11          | 0.07                                           | 1.00      | 0.11       | 0.02                                                | 1.00      | 0.04       |
| rs1803956                      | T>C     | O        | 0.41     | 0.14          | 0.62                                           | 0.02      | 0.11       | 0.64                                                | 0.03      | 0.16       |
| rs34087264                     | C>T     | O        | 0.39     | 0.76          | 0.47                                           | 0.11      | 0.69       | 0.93                                                | 0.02      | 0.22       |
| rs3896021                      | G>T     | C        | 0.52     | 0.13          | 0.10                                           | 0.89      | 0.30       | 0.01                                                | 0.17      | 0.01       |
| rs13817                        | G>A     | C        | 0.35     | 0.48          | 0.05                                           | 0.11      | 0.02       | 0.89                                                | 0.68      | 0.77       |
| rs2234216                      | T>C     | O        | 0.36     | 0.30          | 0.92                                           | 0.003     | 0.13       | 0.53                                                | 0.23      | 0.90       |
| rs6547618                      | G>A     | C        | 0.37     | 0.67          | 0.33                                           | 0.03      | 0.06       | 0.99                                                | 0.15      | 0.43       |
| rs6601178                      | G>A     | C        | 0.47     | 0.61          | 0.01                                           | 0.05      | 0.01       | 0.02                                                | 0.25      | 0.03       |
| rs2270625                      | C>G     | O        | 0.26     | 0.21          | 0.01                                           | 0.20      | 0.01       | 0.31                                                | 0.79      | 0.37       |
| rs17122154                     | A>G     | O        | 0.44     | 0.39          | 0.47                                           | 0.59      | 0.88       | 0.04                                                | 0.43      | 0.07       |
| rs2548551                      | T>G     | C        | 0.13     | 0.41          | 0.22                                           | 0.25      | 0.16       | 0.67                                                | 0.0003    | 0.22       |
| rs10139029                     | A>G     | O        | 0.19     | 0.09          | 0.03                                           | 0.53      | 0.05       | 0.78                                                | 0.82      | 0.75       |
| rs665306                       | T>C     | O        | 0.34     | 0.75          | 0.08                                           | 0.08      | 0.03       | 0.71                                                | 0.84      | 0.85       |
| rs1010222                      | G>A     | O        | 0.13     | 0.71          | 0.34                                           | 0.11      | 0.20       | 0.84                                                | 0.01      | 0.44       |
| rs2271446                      | C>T     | O        | 0.27     | 0.46          | 0.04                                           | 0.26      | 0.05       | 0.07                                                | 0.50      | 0.10       |
| rs3825625                      | C>T     | O        | 0.15     | 0.85          | 0.03                                           | 0.63      | 0.04       | 0.11                                                | 0.51      | 0.10       |
| rs7513326                      | G>A     | C        | 0.43     | 0.10          | 0.12                                           | 0.01      | 0.01       | 0.55                                                | 0.04      | 0.14       |
| rs772254                       | C>T     | O        | 0.21     | 0.14          | 0.02                                           | 0.39      | 0.03       | 0.09                                                | 0.29      | 0.08       |
| rs11668444                     | G>T     | C        | 0.18     | 0.30          | 0.09                                           | 0.02      | 0.02       | 0.38                                                | 0.29      | 0.27       |
| rs1279738                      | C>G     | C        | 0.46     | 0.63          | 0.001                                          | 0.004     | 0.0002     | 0.02                                                | 0.04      | 0.01       |
| rs2075588                      | A>C     | O        | 0.29     | 0.19          | 0.09                                           | 0.27      | 0.06       | 0.31                                                | 0.03      | 0.11       |
| rs3806192                      | G>C     | O        | 0.19     | 0.05          | 0.46                                           | 0.99      | 0.57       | 0.01                                                | 0.98      | 0.03       |
| rs843346                       | C>T     | O        | 0.37     | 0.13          | 0.94                                           | 0.01      | 0.09       | 0.65                                                | 0.01      | 0.11       |
| rs1242095                      | A>C     | O        | 0.36     | 1.00          | 0.55                                           | 0.03      | 0.15       | 0.07                                                | 0.01      | 0.01       |
| rs2292807                      | T>C     | O        | 0.44     | 0.94          | 0.70                                           | 0.03      | 0.29       | 0.31                                                | 0.16      | 0.88       |
| rs6679                         | T>C     | C        | 0.43     | 0.56          | 0.40                                           | 0.64      | 0.75       | 0.04                                                | 0.38      | 0.06       |
| rs11809443                     | T>C     | C        | 0.22     | 0.28          | 0.50                                           | 0.05      | 0.15       | 0.87                                                | 0.25      | 0.56       |

|            |     |   |      |      |      |      |      |      |      |      |
|------------|-----|---|------|------|------|------|------|------|------|------|
| rs2271541  | T>G | O | 0.41 | 0.68 | 0.03 | 0.11 | 0.51 | 0.06 | 0.17 | 0.57 |
| rs3813521  | C>T | C | 0.29 | 0.60 | 0.01 | 0.08 | 0.01 | 0.18 | 0.21 | 0.11 |
| rs7897156  | C>T | O | 0.33 | 0.28 | 0.03 | 0.03 | 0.01 | 0.07 | 0.02 | 0.02 |
| rs4713599  | A>C | O | 0.10 | 0.63 | 0.79 | 0.26 | 0.63 | 0.79 | 0.42 | 0.92 |
| rs2295778  | C>G | C | 0.29 | 0.59 | 0.22 | 0.90 | 0.38 | 0.22 | 0.42 | 0.59 |
| rs7631002  | T>C | O | 0.11 | 0.53 | 0.91 | 0.27 | 0.70 | 0.83 | 0.18 | 0.47 |
| rs1053639  | A>T | O | 0.17 | 0.34 | 0.31 | 0.56 | 0.28 | 0.35 | 0.52 | 0.31 |
| rs3806408  | C>A | C | 0.30 | 0.15 | 0.46 | 0.05 | 0.14 | 0.73 | 0.13 | 0.32 |
| rs3767199  | G>T | O | 0.09 | 0.73 | 0.19 | 0.24 | 0.13 | 0.92 | 0.33 | 0.94 |
| rs10859966 | C>T | O | 0.42 | 0.31 | 0.75 | 0.68 | 0.98 | 0.47 | 0.84 | 0.72 |
| rs1351383  | A>C | C | 0.39 | 0.27 | 0.33 | 0.15 | 0.87 | 0.43 | 0.16 | 0.19 |
| rs3986354  | C>T | O | 0.46 | 0.16 | 0.68 | 0.34 | 0.77 | 0.12 | 0.66 | 0.47 |
| rs2958153  | G>A | O | 0.29 | 0.77 | 0.86 | 0.87 | 0.94 | 0.98 | 0.88 | 0.96 |
| rs479572   | C>G | O | 0.09 | 0.73 | 0.24 | 0.99 | 0.24 | 0.32 | 0.99 | 0.29 |
| rs2284190  | T>C | C | 0.18 | 0.49 | 0.86 | 0.99 | 0.56 | 0.53 | 0.30 | 0.88 |
| rs1064585  | T>G | O | 0.16 | 0.38 | 0.86 | 0.66 | 0.76 | 0.93 | 0.29 | 0.61 |
| rs2819360  | C>T | O | 0.44 | 0.66 | 0.89 | 0.46 | 0.61 | 0.58 | 0.44 | 0.42 |
| rs3755140  | C>T | O | 0.20 | 0.41 | 0.16 | 0.38 | 0.24 | 0.13 | 0.42 | 0.11 |
| rs6671141  | T>G | O | 0.36 | 0.37 | 0.66 | 0.96 | 0.73 | 0.72 | 0.68 | 0.97 |
| rs4324103  | G>A | C | 0.43 | 0.16 | 0.95 | 0.68 | 0.79 | 0.23 | 0.20 | 0.13 |
| rs3812445  | A>G | C | 0.10 | 0.06 | 0.98 | 0.59 | 0.87 | 0.14 | 0.71 | 0.18 |
| rs11823704 | C>A | O | 0.14 | 0.06 | 0.42 | 0.53 | 0.38 | 0.15 | 0.96 | 0.26 |
| rs2070626  | T>C | O | 0.47 | 0.91 | 0.37 | 0.54 | 0.36 | 0.14 | 0.67 | 0.24 |
| rs7942159  | A>G | C | 0.35 | 0.90 | 0.15 | 0.23 | 0.10 | 0.25 | 0.66 | 0.28 |
| rs5750508  | C>T | C | 0.44 | 0.46 | 0.37 | 0.26 | 0.94 | 0.19 | 0.94 | 0.38 |
| rs13624    | T>C | O | 0.14 | 0.41 | 0.09 | 0.99 | 0.36 | 0.58 | 0.28 | 0.94 |
| rs3821321  | G>A | O | 0.42 | 0.41 | 0.64 | 0.90 | 0.69 | 0.21 | 0.34 | 0.16 |
| rs4645287  | A>C | O | 0.57 | 0.40 | 0.27 | 0.81 | 0.64 | 0.70 | 0.97 | 0.81 |
| rs1461957  | G>T | O | 0.17 | 0.35 | 0.83 | 0.82 | 0.80 | 0.99 | 0.64 | 0.88 |
| rs3829051  | T>C | O | 0.31 | 0.34 | 0.39 | 0.24 | 0.94 | 0.20 | 0.12 | 0.88 |
| rs734380   | T>G | O | 0.40 | 0.10 | 0.81 | 0.72 | 0.98 | 0.87 | 0.50 | 0.84 |
| rs2282694  | G>A | O | 0.34 | 0.06 | 0.53 | 0.29 | 0.34 | 0.82 | 0.55 | 0.66 |
| rs2748240  | G>A | O | 0.42 | 0.06 | 0.32 | 0.32 | 0.92 | 0.33 | 0.55 | 0.75 |
| rs613924   | T>C | C | 0.42 | 0.97 | 0.15 | 0.99 | 0.33 | 0.50 | 0.79 | 0.76 |
| rs2908543  | T>A | O | 0.33 | 0.97 | 0.05 | 0.41 | 0.06 | 0.40 | 0.34 | 0.28 |
| rs2288834  | G>A | O | 0.40 | 0.56 | 0.55 | 0.34 | 0.35 | 0.76 | 0.99 | 0.84 |
| rs3760109  | G>T | O | 0.20 | 0.48 | 0.34 | 0.38 | 0.63 | 0.27 | 0.55 | 0.51 |
| rs11102516 | G>A | C | 0.42 | 0.38 | 0.83 | 0.30 | 0.64 | 0.82 | 0.41 | 0.54 |
| rs7314442  | G>A | C | 0.22 | 0.38 | 0.36 | 0.86 | 0.41 | 0.99 | 0.41 | 0.78 |
| rs9700928  | C>A | O | 0.43 | 0.27 | 0.73 | 0.52 | 0.57 | 0.66 | 0.76 | 0.65 |
| rs3827723  | A>G | O | 0.36 | 0.23 | 0.43 | 0.41 | 0.88 | 0.29 | 0.33 | 0.82 |
| rs2857681  | C>G | C | 0.33 | 0.11 | 0.64 | 0.17 | 0.38 | 0.46 | 0.61 | 0.68 |

|            |     |   |      |      |      |      |      |      |      |      |
|------------|-----|---|------|------|------|------|------|------|------|------|
| rs2913861  | T>C | C | 0.20 | 0.07 | 0.47 | 0.43 | 0.38 | 0.92 | 0.43 | 0.68 |
| rs2297480  | G>T | O | 0.22 | 0.06 | 0.62 | 0.87 | 0.75 | 0.81 | 0.69 | 0.98 |
| rs3738037  | C>A | O | 0.08 | 0.06 | 0.89 | 0.74 | 0.99 | 0.91 | 0.83 | 0.87 |
| rs12434539 | A>G | O | 0.34 | 0.05 | 0.66 | 0.63 | 0.58 | 0.58 | 0.57 | 0.50 |
| rs10877028 | G>T | C | 0.18 | 0.97 | 0.13 | 0.33 | 0.30 | 0.17 | 0.44 | 0.32 |
| rs866484   | C>G | O | 0.28 | 0.81 | 0.25 | 0.44 | 0.23 | 0.35 | 0.43 | 0.29 |
| rs2913856  | A>G | O | 0.43 | 0.47 | 0.35 | 0.91 | 0.60 | 0.99 | 0.73 | 0.85 |
| rs7071351  | C>A | O | 0.47 | 0.45 | 0.45 | 0.58 | 0.42 | 0.99 | 0.31 | 0.54 |
| rs7648309  | G>A | O | 0.37 | 0.37 | 0.76 | 0.83 | 0.90 | 0.27 | 0.50 | 0.26 |
| rs284573   | C>G | O | 0.14 | 0.28 | 0.82 | 0.90 | 0.88 | 0.41 | 0.47 | 0.62 |
| rs7089806  | C>G | O | 0.15 | 0.17 | 0.81 | 0.75 | 0.76 | 0.59 | 0.88 | 0.71 |
| rs2072236  | C>T | O | 0.12 | 0.10 | 0.23 |      | 0.23 | 0.64 |      | 0.64 |
| rs7948073  | T>G | O | 0.24 | 0.08 | 0.15 | 0.42 | 0.16 | 0.59 | 0.25 | 0.38 |
| rs7926547  | C>G | O | 0.39 | 0.06 | 0.20 | 0.30 | 0.17 | 0.67 | 0.63 | 0.59 |
| rs17629719 | T>G | O | 0.19 | 0.98 | 0.77 | 0.07 | 0.44 | 0.48 | 0.53 | 0.42 |
| rs7117343  | C>G | O | 0.28 | 0.83 | 0.58 | 0.32 | 0.38 | 0.84 | 0.28 | 0.52 |
| rs12452627 | G>A | O | 0.15 | 0.82 | 0.88 | 0.28 | 0.66 | 0.56 | 0.72 | 0.67 |
| rs2712429  | C>A | O | 0.14 | 0.52 | 0.84 | 0.51 | 0.97 | 0.60 | 0.44 | 0.48 |
| rs549794   | A>G | O | 0.32 | 0.19 | 0.59 | 0.33 | 0.40 | 0.17 | 1.00 | 0.31 |
| rs2403279  | C>A | O | 0.36 | 0.17 | 0.18 | 0.83 | 0.27 | 0.21 | 0.70 | 0.27 |
| rs28407517 | C>T | O | 0.34 | 0.16 | 0.92 | 0.62 | 0.76 | 0.25 | 0.95 | 0.40 |
| rs1043968  | C>G | C | 0.18 | 0.12 | 0.35 | 0.46 | 0.69 | 0.88 | 0.84 | 0.96 |
| rs10876254 | A>G | O | 0.49 | 0.07 | 0.88 | 0.22 | 0.41 | 0.73 | 0.90 | 0.90 |
| rs7073334  | C>T | O | 0.16 | 0.07 | 0.79 | 0.81 | 0.76 | 0.61 | 0.80 | 0.76 |
| rs158366   | C>G | O | 0.36 | 0.98 | 0.67 | 0.18 | 0.70 | 0.89 | 0.38 | 0.73 |
| rs6502051  | A>C | C | 0.09 | 0.69 | 0.95 | 0.99 | 0.71 | 0.93 | 0.98 | 0.76 |
| rs1122731  | G>A | O | 0.20 | 0.59 | 0.74 | 0.99 | 0.98 | 0.45 | 0.99 | 0.26 |
| rs10149569 | A>C | O | 0.11 | 0.49 | 0.82 | 0.99 | 0.78 | 0.45 | 0.99 | 0.39 |
| rs10840108 | T>C | O | 0.35 | 0.45 | 0.36 | 0.13 | 0.15 | 0.40 | 0.32 | 0.28 |
| rs2272532  | A>G | O | 0.22 | 0.43 | 0.68 | 0.81 | 0.67 | 0.96 | 0.60 | 0.87 |
| rs13167616 | G>C | O | 0.13 | 0.29 | 0.97 | 0.71 | 0.87 | 0.40 | 0.41 | 0.69 |
| rs34291864 | G>T | O | 0.18 | 0.25 | 0.58 | 0.87 | 0.59 | 0.28 | 0.35 | 0.22 |
| rs10781517 | C>T | O | 0.14 | 0.24 | 0.33 | 0.31 | 0.67 | 0.41 | 0.50 | 0.65 |
| rs2240275  | G>A | C | 0.41 | 0.23 | 0.65 | 0.45 | 0.96 | 0.71 | 0.32 | 0.44 |
| rs2227562  | G>A | O | 0.34 | 0.17 | 0.68 | 0.47 | 0.52 | 0.12 | 0.16 | 0.07 |
| rs2071391  | A>G | O | 0.47 | 0.16 | 0.44 | 0.40 | 0.34 | 0.58 | 0.63 | 0.53 |
| rs2247322  | T>A | O | 0.35 | 0.15 | 0.94 | 0.68 | 0.80 | 0.50 | 0.53 | 0.43 |
| rs3750997  | A>C | O | 0.47 | 0.14 | 0.70 | 0.94 | 0.77 | 0.31 | 0.17 | 0.14 |
| rs12609068 | A>T | C | 0.28 | 0.11 | 0.84 | 0.46 | 0.63 | 0.93 | 0.26 | 0.58 |
| rs580808   | C>T | O | 0.17 | 0.08 | 0.18 | 0.98 | 0.10 | 0.53 | 0.18 | 0.30 |
| rs1976700  | G>C | O | 0.45 | 0.07 | 0.11 | 0.68 | 0.43 | 0.07 | 0.44 | 0.11 |
| rs3809112  | C>T | C | 0.30 | 0.06 | 0.13 | 0.72 | 0.22 | 0.30 | 0.33 | 0.23 |

|            |     |   |      |      |      |      |      |      |      |      |
|------------|-----|---|------|------|------|------|------|------|------|------|
| rs839763   | T>C | O | 0.14 | 0.05 | 0.85 | 0.64 | 0.99 | 0.47 | 0.44 | 0.80 |
| rs625750   | C>T | O | 0.37 | 0.84 | 0.39 | 0.88 | 0.58 | 0.16 | 0.50 | 0.51 |
| rs3827550  | C>G | C | 0.33 | 0.69 | 0.79 | 0.86 | 0.78 | 0.94 | 0.34 | 0.63 |
| rs2954657  | C>T | O | 0.28 | 0.67 | 0.27 | 0.69 | 0.29 | 0.41 | 0.32 | 0.81 |
| rs3849682  | G>A | O | 0.25 | 0.53 | 0.99 | 0.44 | 0.77 | 0.40 | 0.34 | 0.29 |
| rs4645943  | C>T | O | 0.28 | 0.51 | 0.53 | 0.38 | 0.38 | 0.75 | 0.88 | 0.75 |
| rs929953   | A>G | O | 0.35 | 0.34 | 0.76 | 0.32 | 0.78 | 0.30 | 0.31 | 0.22 |
| rs10747783 | C>T | O | 0.27 | 0.26 | 0.61 | 0.85 | 0.78 | 0.64 | 0.81 | 0.81 |
| rs1889532  | G>A | O | 0.14 | 0.25 | 0.47 | 0.42 | 0.69 | 0.55 | 1.00 | 0.60 |
| rs3757672  | T>C | O | 0.11 | 0.10 | 0.41 | 0.74 | 0.41 | 0.69 | 0.16 | 0.48 |
| rs629426   | A>G | O | 0.20 | 0.07 | 0.31 | 0.96 | 0.42 | 0.97 | 0.44 | 0.77 |
| rs4135159  | A>C | O | 0.42 | 0.06 | 0.12 | 0.27 | 0.10 | 0.78 | 0.28 | 0.44 |
| rs7366009  | A>G | O | 0.21 | 0.05 | 0.33 | 0.60 | 0.34 | 0.64 | 0.49 | 0.51 |
| rs1567583  | G>T | C | 0.08 | 0.93 | 0.13 | 0.99 | 0.57 | 0.44 | 0.99 | 0.95 |
| rs31726    | A>G | C | 0.43 | 0.91 | 0.31 | 0.44 | 0.28 | 0.11 | 0.90 | 0.34 |
| rs3741440  | C>T | O | 0.07 | 0.71 | 0.88 | 0.99 | 0.86 | 0.09 | 0.99 | 0.12 |
| rs2070912  | A>G | O | 0.13 | 0.63 | 0.88 | 0.99 | 1.00 | 0.84 | 0.38 | 0.74 |
| rs3803800  | G>A | C | 0.34 | 0.48 | 0.91 | 0.51 | 0.69 | 0.31 | 0.36 | 0.75 |
| rs1723285  | G>A | O | 0.14 | 0.47 | 0.29 | 0.99 | 0.23 | 0.37 | 0.79 | 0.37 |
| rs2291617  | G>T | C | 0.27 | 0.22 | 0.20 | 0.75 | 0.28 | 0.35 | 0.63 | 0.36 |
| rs2735784  | A>G | O | 0.43 | 0.88 | 0.79 | 0.90 | 0.80 | 0.37 | 0.84 | 0.48 |
| rs2273913  | T>C | C | 0.47 | 0.84 | 0.70 | 0.48 | 0.85 | 0.96 | 0.20 | 0.42 |
| rs1002193  | C>G | O | 0.34 | 0.84 | 0.41 | 0.22 | 0.21 | 0.13 | 0.28 | 0.10 |
| rs4148879  | G>A | C | 0.17 | 0.84 | 0.43 | 0.24 | 0.30 | 0.34 | 0.24 | 0.23 |
| rs3813570  | T>C | O | 0.48 | 0.79 | 0.93 | 0.11 | 0.29 | 0.54 | 0.49 | 0.96 |
| rs2295685  | G>A | O | 0.24 | 0.71 | 0.29 | 0.97 | 0.38 | 0.62 | 0.63 | 0.56 |
| rs228272   | T>C | C | 0.41 | 0.64 | 0.67 | 0.98 | 0.76 | 0.58 | 0.63 | 0.53 |
| rs1461496  | G>A | O | 0.45 | 0.53 | 0.69 | 0.12 | 0.26 | 0.96 | 0.13 | 0.37 |
| rs2079786  | T>G | O | 0.14 | 0.49 | 0.88 | 0.99 | 0.89 | 0.74 | 0.98 | 0.46 |
| rs2070876  | T>C | C | 0.48 | 0.48 | 0.51 | 0.52 | 0.97 | 0.31 | 0.67 | 0.38 |
| rs4735054  | G>T | O | 0.42 | 0.44 | 0.37 | 0.81 | 0.48 | 0.27 | 0.45 | 0.25 |
| rs10424568 | G>A | O | 0.28 | 0.27 | 0.17 | 0.73 | 0.37 | 0.21 | 0.60 | 0.24 |
| rs2845597  | G>A | O | 0.30 | 0.24 | 0.61 | 0.32 | 0.95 | 0.14 | 0.09 | 0.07 |
| rs3806515  | C>T | O | 0.13 | 0.08 | 0.31 | 0.41 | 0.25 | 0.25 | 0.95 | 0.34 |
| rs13169435 | C>T | C | 0.15 | 0.78 | 0.47 | 0.88 | 0.54 | 0.29 | 0.62 | 0.28 |
| rs3789039  | T>C | O | 0.26 | 0.71 | 0.47 | 0.39 | 0.88 | 0.13 | 0.26 | 0.55 |
| rs3809173  | G>T | O | 0.30 | 0.69 | 0.24 | 0.18 | 0.13 | 0.45 | 0.50 | 0.37 |
| rs12901682 | C>A | O | 0.10 | 0.57 | 0.56 | 0.75 | 0.55 | 0.74 | 0.74 | 0.81 |
| rs937215   | T>C | O | 0.19 | 0.87 | 0.47 | 0.58 | 0.42 | 0.74 | 0.75 | 0.70 |
| rs2930975  | C>G | O | 0.19 | 0.79 | 0.27 | 0.60 | 0.26 | 0.08 | 0.70 | 0.10 |
| rs17305311 | T>C | O | 0.38 | 0.58 | 0.67 | 0.54 | 1.00 | 0.93 | 0.66 | 0.88 |
| rs2284992  | G>T | C | 0.32 | 0.46 | 0.48 | 0.72 | 0.49 | 0.31 | 0.36 | 0.24 |

|            |     |   |      |      |      |      |      |      |      |      |
|------------|-----|---|------|------|------|------|------|------|------|------|
| rs17182246 | G>C | O | 0.35 | 0.42 | 0.35 | 0.35 | 0.88 | 0.42 | 0.09 | 0.75 |
| rs7935835  | G>A | C | 0.23 | 0.31 | 0.07 | 0.25 | 0.21 | 0.08 | 0.58 | 0.18 |
| rs3820312  | A>C | O | 0.37 | 0.06 | 0.54 | 0.56 | 0.90 | 0.75 | 0.93 | 0.86 |
| rs8003631  | T>C | C | 0.38 | 0.86 | 0.62 | 0.85 | 0.79 | 0.24 | 0.30 | 0.71 |
| rs3810288  | C>G | C | 0.30 | 0.68 | 0.80 | 0.55 | 0.65 | 0.16 | 0.59 | 0.18 |
| rs2424993  | C>G | O | 0.45 | 0.60 | 0.18 | 0.86 | 0.45 | 0.08 | 0.84 | 0.22 |
| rs1127155  | G>A | O | 0.38 | 0.39 | 0.38 | 0.30 | 0.25 | 0.95 | 0.49 | 0.69 |
| rs2286620  | T>C | O | 0.22 | 0.22 | 0.43 | 0.58 | 0.61 | 0.90 | 0.34 | 0.66 |
| rs2966449  | C>T | C | 0.22 | 0.11 | 0.47 | 0.69 | 0.71 | 0.43 | 0.75 | 0.45 |
| rs2012124  | C>T | O | 0.41 | 0.97 | 0.18 | 0.86 | 0.41 | 0.30 | 0.28 | 0.90 |
| rs10902227 | C>T | C | 0.36 | 0.73 | 0.52 | 0.93 | 0.62 | 0.05 | 0.51 | 0.09 |
| rs9427715  | T>G | O | 0.51 | 0.69 | 0.47 | 0.70 | 0.83 | 0.78 | 0.21 | 0.33 |
| rs534812   | A>G | O | 0.36 | 0.55 | 0.17 | 0.62 | 0.21 | 0.09 | 0.88 | 0.20 |
| rs1467110  | G>C | O | 0.42 | 0.30 | 0.18 | 0.12 | 0.07 | 0.90 | 0.52 | 0.66 |
| rs2303040  | T>C | O | 0.43 | 0.81 | 0.68 | 0.36 | 0.43 | 0.26 | 0.48 | 0.24 |
| rs800351   | T>C | O | 0.45 | 0.70 | 0.71 | 0.89 | 0.88 | 0.92 | 0.61 | 0.72 |
| rs7132224  | A>G | O | 0.52 | 0.42 | 0.37 | 0.37 | 0.27 | 0.83 | 0.14 | 0.29 |
| rs3740883  | C>T | O | 0.17 | 0.10 | 0.93 | 0.21 | 0.62 | 0.56 | 0.33 | 0.40 |
| rs9981301  | G>C | C | 0.50 | 0.94 | 0.64 | 0.71 | 0.94 | 0.56 | 0.59 | 0.99 |
| rs12485058 | A>G | O | 0.24 | 0.19 | 0.56 | 0.93 | 0.64 | 0.91 | 0.53 | 0.91 |

Abbreviations: MAF, minor allele frequency; HWE-*P*, *P* for Hardy-Weinberg equilibrium test.

<sup>a</sup> O: SNP located on the gene, C: SNP closest to the gene.

<sup>b</sup> *P*-values were calculated using multivariate Cox proportional hazard models, adjusted for age, sex, smoking status, pathologic stage, and adjuvant therapy.





|            |            |                 |      |                 |      |      |                 |      |                 |      |      |
|------------|------------|-----------------|------|-----------------|------|------|-----------------|------|-----------------|------|------|
|            | Dominant   | 1.85(1.07-3.23) | 0.03 | 0.60(0.28-1.29) | 0.19 | 0.02 | 1.40(0.88-2.24) | 0.16 | 0.88(0.56-1.39) | 0.59 | 0.17 |
|            | Recessive  | 1.12(0.26-4.88) | 0.88 | 0(0-.)          | 0.99 |      | 1.78(0.63-5.04) | 0.28 | 0.42(0.06-3.11) | 0.40 | 0.21 |
|            | Codominant | 1.57(0.99-2.48) | 0.05 | 0.57(0.29-1.14) | 0.11 | 0.02 | 1.37(0.93-2.03) | 0.11 | 0.86(0.57-1.30) | 0.46 | 0.11 |
| rs17528989 |            |                 |      |                 |      |      |                 |      |                 |      |      |
|            | Dominant   | 1.04(0.58-1.89) | 0.89 | 0.53(0.23-1.22) | 0.13 | 0.20 | 1.20(0.74-1.93) | 0.47 | 0.80(0.49-1.30) | 0.37 | 0.24 |
|            | Recessive  | 2.19(0.67-7.21) | 0.20 | 0.72(0.10-5.40) | 0.75 | 0.35 | 3.61(1.43-9.13) | 0.01 | 0.47(0.11-1.93) | 0.29 | 0.02 |
|            | Codominant | 1.14(0.70-1.88) | 0.60 | 0.60(0.29-1.24) | 0.17 | 0.15 | 1.35(0.90-2.02) | 0.15 | 0.79(0.52-1.19) | 0.26 | 0.07 |
| rs2425047  |            |                 |      |                 |      |      |                 |      |                 |      |      |
|            | Dominant   | 0.92(0.51-1.64) | 0.78 | 0.67(0.31-1.44) | 0.30 | 0.52 | 0.96(0.61-1.52) | 0.87 | 1.08(0.67-1.74) | 0.76 | 0.73 |
|            | Recessive  | 3.28(1.25-8.62) | 0.02 | 0(0-.)          | 0.99 |      | 1.95(0.77-4.94) | 0.16 | 1.25(0.31-5.15) | 0.75 | 0.61 |
|            | Codominant | 1.15(0.71-1.86) | 0.56 | 0.65(0.31-1.37) | 0.26 | 0.21 | 1.07(0.72-1.57) | 0.75 | 1.08(0.71-1.66) | 0.71 | 0.97 |
| rs1136267  |            |                 |      |                 |      |      |                 |      |                 |      |      |
|            | Dominant   | 1.64(0.97-2.78) | 0.07 | 1.03(0.54-1.98) | 0.92 | 0.28 | 1.66(1.08-2.56) | 0.02 | 1.01(0.67-1.53) | 0.96 | 0.10 |
|            | Recessive  | 1.00(0.22-4.53) | 1.00 | 0.88(0.12-6.47) | 0.90 | 0.92 | 1.00(0.24-4.19) | 1.00 | 0.23(0.03-1.66) | 0.15 | 0.24 |
|            | Codominant | 1.43(0.92-2.22) | 0.11 | 1.01(0.57-1.81) | 0.96 | 0.35 | 1.48(1.02-2.15) | 0.04 | 0.91(0.63-1.30) | 0.60 | 0.06 |
| rs1803956  |            |                 |      |                 |      |      |                 |      |                 |      |      |
|            | Dominant   | 1.15(0.66-2.02) | 0.62 | 1.04(0.52-2.08) | 0.91 | 0.83 | 1.11(0.71-1.75) | 0.64 | 0.91(0.59-1.40) | 0.65 | 0.53 |
|            | Recessive  | 2.19(1.16-4.13) | 0.02 | 1.20(0.54-2.67) | 0.65 | 0.25 | 1.78(1.04-3.04) | 0.03 | 1.46(0.89-2.42) | 0.14 | 0.60 |
|            | Codominant | 1.36(0.93-2.00) | 0.11 | 1.08(0.68-1.71) | 0.74 | 0.45 | 1.25(0.92-1.70) | 0.16 | 1.08(0.80-1.46) | 0.61 | 0.51 |
| rs34087264 |            |                 |      |                 |      |      |                 |      |                 |      |      |
|            | Dominant   | 1.24(0.70-2.19) | 0.47 | 1.07(0.53-2.18) | 0.85 | 0.75 | 1.02(0.66-1.59) | 0.93 | 1.04(0.66-1.64) | 0.88 | 0.95 |
|            | Recessive  | 0.51(0.22-1.16) | 0.11 | 1.12(0.51-2.48) | 0.78 | 0.18 | 0.43(0.21-0.88) | 0.02 | 0.97(0.58-1.63) | 0.90 | 0.07 |
|            | Codominant | 0.93(0.64-1.34) | 0.69 | 1.07(0.67-1.70) | 0.78 | 0.64 | 0.83(0.62-1.12) | 0.22 | 1.01(0.75-1.35) | 0.98 | 0.36 |
| rs3896021  |            |                 |      |                 |      |      |                 |      |                 |      |      |
|            | Dominant   | 0.60(0.32-1.11) | 0.10 | 1.28(0.55-2.98) | 0.57 | 0.16 | 0.50(0.30-0.81) | 0.01 | 0.82(0.51-1.31) | 0.40 | 0.15 |
|            | Recessive  | 0.96(0.53-1.75) | 0.89 | 0.89(0.36-2.18) | 0.79 | 0.89 | 0.70(0.42-1.17) | 0.17 | 0.76(0.41-1.39) | 0.37 | 0.84 |
|            | Codominant | 0.82(0.57-1.2)  | 0.30 | 1.06(0.63-1.79) | 0.83 | 0.44 | 0.67(0.49-0.92) | 0.01 | 0.83(0.60-1.16) | 0.28 | 0.36 |
| rs13817    |            |                 |      |                 |      |      |                 |      |                 |      |      |
|            | Dominant   | 1.80(1.00-3.23) | 0.05 | 1.16(0.59-2.27) | 0.67 | 0.33 | 1.03(0.66-1.62) | 0.89 | 1.24(0.80-1.92) | 0.33 | 0.56 |
|            | Recessive  | 1.94(0.86-4.40) | 0.11 | 0.34(0.08-1.42) | 0.14 | 0.04 | 1.16(0.58-2.34) | 0.68 | 1.13(0.59-2.15) | 0.71 | 0.96 |
|            | Codominant | 1.63(1.07-2.48) | 0.02 | 0.89(0.55-1.45) | 0.63 | 0.07 | 1.05(0.75-1.48) | 0.77 | 1.16(0.85-1.59) | 0.36 | 0.68 |
| rs2234216  |            |                 |      |                 |      |      |                 |      |                 |      |      |
|            | Dominant   | 1.03(0.60-1.78) | 0.92 | 0.71(0.36-1.40) | 0.33 | 0.40 | 0.87(0.57-1.34) | 0.53 | 0.86(0.56-1.31) | 0.48 | 0.97 |
|            | Recessive  | 2.84(1.45-5.60) | 0.00 | 1.52(0.62-3.73) | 0.36 | 0.28 | 1.44(0.79-2.61) | 0.23 | 1.05(0.54-2.04) | 0.89 | 0.49 |
|            | Codominant | 1.37(0.91-2.07) | 0.13 | 0.93(0.56-1.54) | 0.77 | 0.24 | 1.02(0.74-1.41) | 0.90 | 0.93(0.67-1.28) | 0.65 | 0.69 |
| rs6547618  |            |                 |      |                 |      |      |                 |      |                 |      |      |
|            | Dominant   | 0.74(0.41-1.34) | 0.33 | 1.35(0.69-2.62) | 0.38 | 0.19 | 1.00(0.63-1.59) | 0.99 | 1.20(0.78-1.86) | 0.41 | 0.58 |
|            | Recessive  | 0.28(0.09-0.91) | 0.03 | 0.92(0.27-3.17) | 0.89 | 0.17 | 0.59(0.29-1.20) | 0.15 | 0.75(0.34-1.65) | 0.47 | 0.66 |
|            | Codominant | 0.66(0.43-1.02) | 0.06 | 1.18(0.71-1.96) | 0.52 | 0.09 | 0.88(0.64-1.21) | 0.43 | 1.05(0.76-1.45) | 0.77 | 0.45 |

|            |                  |      |                 |      |      |                  |      |                  |      |      |
|------------|------------------|------|-----------------|------|------|------------------|------|------------------|------|------|
| rs6601178  |                  |      |                 |      |      |                  |      |                  |      |      |
| Dominant   | 2.33(1.22-4.43)  | 0.01 | 0.64(0.32-1.27) | 0.20 | 0.01 | 1.85(1.12-3.05)  | 0.02 | 0.92(0.59-1.46)  | 0.73 | 0.04 |
| Recessive  | 1.80(1.00-3.27)  | 0.05 | 1.24(0.54-2.83) | 0.62 | 0.47 | 1.35(0.81-2.23)  | 0.25 | 1.51(0.90-2.55)  | 0.12 | 0.76 |
| Codominant | 1.66(1.16-2.38)  | 0.01 | 0.86(0.51-1.43) | 0.55 | 0.04 | 1.40(1.04-1.87)  | 0.03 | 1.11(0.80-1.53)  | 0.54 | 0.29 |
| rs2270625  |                  |      |                 |      |      |                  |      |                  |      |      |
| Dominant   | 2.08(1.2-3.58)   | 0.01 | 1.02(0.52-1.97) | 0.96 | 0.10 | 1.26(0.81-1.95)  | 0.31 | 0.80(0.52-1.23)  | 0.31 | 0.15 |
| Recessive  | 1.78(0.74-4.30)  | 0.20 | 1.79(0.54-5.97) | 0.34 | 0.99 | 1.11(0.52-2.34)  | 0.79 | 0.60(0.19-1.91)  | 0.39 | 0.38 |
| Codominant | 1.67(1.13-2.47)  | 0.01 | 1.11(0.65-1.91) | 0.70 | 0.23 | 1.16(0.84-1.60)  | 0.37 | 0.80(0.55-1.16)  | 0.24 | 0.14 |
| rs17122154 |                  |      |                 |      |      |                  |      |                  |      |      |
| Dominant   | 1.26(0.68-2.36)  | 0.47 | 1.25(0.60-2.62) | 0.55 | 0.99 | 1.76(1.04-3.00)  | 0.04 | 1.12(0.71-1.77)  | 0.63 | 0.21 |
| Recessive  | 0.83(0.42-1.64)  | 0.59 | 2.44(1.21-4.92) | 0.01 | 0.03 | 1.23(0.74-2.03)  | 0.43 | 1.05(0.61-1.82)  | 0.86 | 0.68 |
| Codominant | 1.03(0.71-1.50)  | 0.88 | 1.55(0.96-2.48) | 0.07 | 0.18 | 1.31(0.97-1.77)  | 0.07 | 1.07(0.79-1.44)  | 0.67 | 0.35 |
| rs2548551  |                  |      |                 |      |      |                  |      |                  |      |      |
| Dominant   | 1.46(0.79-2.70)  | 0.22 | 0.75(0.32-1.77) | 0.51 | 0.22 | 1.12(0.68-1.84)  | 0.67 | 0.79(0.45-1.39)  | 0.42 | 0.36 |
| Recessive  | 2.11(0.59-7.55)  | 0.25 | 0(0-.)          | 0.99 |      | 8.04(2.60-24.88) | 0.00 | 2.01(0.27-15.05) | 0.50 | 0.24 |
| Codominant | 1.43(0.87-2.34)  | 0.16 | 0.75(0.32-1.75) | 0.50 | 0.20 | 1.32(0.85-2.07)  | 0.22 | 0.84(0.49-1.43)  | 0.52 | 0.20 |
| rs10139029 |                  |      |                 |      |      |                  |      |                  |      |      |
| Dominant   | 1.92(1.05-3.49)  | 0.03 | 1.05(0.52-2.10) | 0.90 | 0.20 | 1.08(0.65-1.77)  | 0.78 | 1.05(0.67-1.64)  | 0.84 | 0.93 |
| Recessive  | 1.46(0.45-4.80)  | 0.53 | 1.30(0.17-9.92) | 0.80 | 0.92 | 1.11(0.45-2.78)  | 0.82 | 1.13(0.35-3.68)  | 0.84 | 0.98 |
| Codominant | 1.58(1.00-2.50)  | 0.05 | 1.06(0.57-1.99) | 0.86 | 0.32 | 1.06(0.73-1.56)  | 0.75 | 1.05(0.71-1.55)  | 0.81 | 0.97 |
| rs665306   |                  |      |                 |      |      |                  |      |                  |      |      |
| Dominant   | 1.71(0.95-3.09)  | 0.08 | 1.23(0.63-2.40) | 0.54 | 0.47 | 0.92(0.58-1.45)  | 0.71 | 1.26(0.82-1.94)  | 0.29 | 0.33 |
| Recessive  | 2.08(0.91-4.76)  | 0.08 | 0.36(0.09-1.51) | 0.16 | 0.04 | 1.07(0.53-2.17)  | 0.84 | 1.11(0.59-2.12)  | 0.74 | 0.94 |
| Codominant | 1.62(1.05-2.49)  | 0.03 | 0.94(0.58-1.51) | 0.79 | 0.10 | 0.97(0.69-1.36)  | 0.85 | 1.16(0.85-1.59)  | 0.34 | 0.45 |
| rs1010222  |                  |      |                 |      |      |                  |      |                  |      |      |
| Dominant   | 1.37(0.72-2.6)   | 0.34 | 0.87(0.42-1.81) | 0.72 | 0.36 | 1.06(0.62-1.79)  | 0.84 | 1.14(0.72-1.81)  | 0.57 | 0.84 |
| Recessive  | 3.28(0.76-14.16) | 0.11 | 0(0-.)          | 0.99 |      | 4.55(1.35-15.32) | 0.01 | 1.45(0.58-3.64)  | 0.43 | 0.14 |
| Codominant | 1.45(0.83-2.53)  | 0.20 | 0.74(0.40-1.37) | 0.34 | 0.11 | 1.21(0.75-1.95)  | 0.44 | 1.15(0.80-1.67)  | 0.45 | 0.87 |
| rs2271446  |                  |      |                 |      |      |                  |      |                  |      |      |
| Dominant   | 1.79(1.02-3.14)  | 0.04 | 1.13(0.58-2.19) | 0.72 | 0.30 | 1.52(0.97-2.40)  | 0.07 | 1.11(0.72-1.71)  | 0.63 | 0.33 |
| Recessive  | 1.62(0.70-3.72)  | 0.26 | 0.55(0.13-2.28) | 0.41 | 0.20 | 1.30(0.61-2.76)  | 0.50 | 0.77(0.36-1.68)  | 0.51 | 0.34 |
| Codominant | 1.48(1.01-2.17)  | 0.05 | 0.97(0.59-1.61) | 0.91 | 0.19 | 1.32(0.95-1.84)  | 0.10 | 1.01(0.74-1.39)  | 0.95 | 0.25 |
| rs3825625  |                  |      |                 |      |      |                  |      |                  |      |      |
| Dominant   | 1.90(1.05-3.44)  | 0.03 | 1.53(0.74-3.13) | 0.25 | 0.65 | 1.49(0.92-2.43)  | 0.11 | 1.02(0.62-1.66)  | 0.95 | 0.28 |
| Recessive  | 1.66(0.22-12.71) | 0.63 | 0(0-.)          | 0.99 |      | 1.62(0.38-6.95)  | 0.51 | 1.45(0.19-11.05) | 0.72 | 0.93 |
| Codominant | 1.75(1.04-2.97)  | 0.04 | 1.45(0.72-2.9)  | 0.30 | 0.67 | 1.44(0.93-2.22)  | 0.10 | 1.03(0.65-1.65)  | 0.90 | 0.30 |
| rs7513326  |                  |      |                 |      |      |                  |      |                  |      |      |
| Dominant   | 1.64(0.88-3.05)  | 0.12 | 0.87(0.44-1.74) | 0.69 | 0.18 | 1.16(0.72-1.87)  | 0.55 | 1.12(0.70-1.81)  | 0.63 | 0.92 |
| Recessive  | 2.37(1.24-4.56)  | 0.01 | 0.75(0.26-2.13) | 0.59 | 0.07 | 1.74(1.02-2.96)  | 0.04 | 1.62(0.94-2.79)  | 0.08 | 0.85 |

|            |            |                 |      |                  |      |      |                 |      |                  |      |      |
|------------|------------|-----------------|------|------------------|------|------|-----------------|------|------------------|------|------|
| rs772254   | Codominant | 1.66(1.11-2.47) | 0.01 | 0.86(0.51-1.44)  | 0.56 | 0.05 | 1.27(0.93-1.75) | 0.14 | 1.25(0.89-1.75)  | 0.20 | 0.95 |
|            | Dominant   | 2.03(1.12-3.68) | 0.02 | 0.75(0.36-1.55)  | 0.43 | 0.04 | 1.51(0.94-2.42) | 0.09 | 0.68(0.43-1.09)  | 0.11 | 0.02 |
|            | Recessive  | 1.59(0.55-4.62) | 0.39 | 0(0-.)           | 0.99 |      | 1.60(0.67-3.79) | 0.29 | 1.35(0.42-4.40)  | 0.62 | 0.82 |
| rs11668444 | Codominant | 1.61(1.05-2.48) | 0.03 | 0.71(0.36-1.39)  | 0.31 | 0.04 | 1.38(0.97-1.98) | 0.08 | 0.76(0.50-1.15)  | 0.19 | 0.03 |
|            | Dominant   | 1.74(0.93-3.25) | 0.09 | 1.06(0.53-2.13)  | 0.87 | 0.30 | 1.25(0.76-2.04) | 0.38 | 0.63(0.38-1.03)  | 0.06 | 0.05 |
|            | Recessive  | 3.46(1.21-9.94) | 0.02 | 2.13(0.26-17.43) | 0.48 | 0.69 | 1.75(0.62-4.88) | 0.29 | 3.42(1.14-10.26) | 0.03 | 0.38 |
| rs1279738  | Codominant | 1.74(1.08-2.82) | 0.02 | 1.11(0.59-2.11)  | 0.75 | 0.27 | 1.26(0.84-1.88) | 0.27 | 0.76(0.49-1.19)  | 0.24 | 0.10 |
|            | Dominant   | 3.40(1.63-7.09) | 0.00 | 1.01(0.51-2.01)  | 0.97 | 0.02 | 1.92(1.12-3.30) | 0.02 | 0.79(0.51-1.21)  | 0.28 | 0.01 |
|            | Recessive  | 2.48(1.34-4.60) | 0.00 | 1.83(0.82-4.08)  | 0.14 | 0.56 | 1.74(1.02-2.97) | 0.04 | 1.48(0.85-2.58)  | 0.16 | 0.68 |
| rs2075588  | Codominant | 2.09(1.42-3.08) | 0.00 | 1.22(0.75-1.98)  | 0.43 | 0.09 | 1.56(1.13-2.15) | 0.01 | 0.99(0.72-1.37)  | 0.95 | 0.05 |
|            | Dominant   | 1.63(0.93-2.85) | 0.09 | 0.62(0.32-1.18)  | 0.14 | 0.03 | 1.26(0.81-1.95) | 0.31 | 0.67(0.44-1.03)  | 0.07 | 0.04 |
|            | Recessive  | 1.69(0.66-4.33) | 0.27 | 0.29(0.04-2.12)  | 0.22 | 0.12 | 2.42(1.07-5.47) | 0.03 | 0.51(0.21-1.28)  | 0.15 | 0.01 |
| rs3806192  | Codominant | 1.50(0.98-2.30) | 0.06 | 0.61(0.35-1.07)  | 0.08 | 0.01 | 1.36(0.94-1.97) | 0.11 | 0.69(0.49-0.98)  | 0.04 | 0.01 |
|            | Dominant   | 1.24(0.70-2.21) | 0.46 | 0.99(0.50-1.95)  | 0.97 | 0.62 | 1.81(1.13-2.9)  | 0.01 | 0.76(0.48-1.19)  | 0.23 | 0.01 |
|            | Recessive  | 0(0-.)          | 0.99 | 1.90(0.40-8.97)  | 0.42 |      | 0(0-.)          | 0.98 | 1.10(0.33-3.71)  | 0.88 |      |
| rs843346   | Codominant | 1.17(0.68-2.03) | 0.57 | 1.07(0.59-1.95)  | 0.82 | 0.83 | 1.59(1.03-2.44) | 0.03 | 0.81(0.54-1.22)  | 0.31 | 0.03 |
|            | Dominant   | 0.98(0.55-1.75) | 0.94 | 1.11(0.57-2.15)  | 0.76 | 0.78 | 0.90(0.57-1.42) | 0.65 | 0.99(0.64-1.52)  | 0.95 | 0.77 |
|            | Recessive  | 0.08(0.01-0.58) | 0.01 | 0.68(0.23-2.01)  | 0.49 | 0.06 | 0.32(0.13-0.79) | 0.01 | 0.92(0.46-1.85)  | 0.82 | 0.07 |
| rs1242095  | Codominant | 0.70(0.46-1.06) | 0.09 | 0.97(0.61-1.56)  | 0.90 | 0.31 | 0.77(0.55-1.06) | 0.11 | 0.98(0.71-1.35)  | 0.88 | 0.30 |
|            | Dominant   | 1.19(0.67-2.12) | 0.55 | 0.95(0.48-1.86)  | 0.87 | 0.62 | 1.53(0.96-2.44) | 0.07 | 0.89(0.58-1.36)  | 0.59 | 0.09 |
|            | Recessive  | 2.69(1.13-6.38) | 0.03 | 0.92(0.40-2.10)  | 0.84 | 0.08 | 2.19(1.18-4.07) | 0.01 | 0.79(0.46-1.39)  | 0.42 | 0.02 |
| rs2292807  | Codominant | 1.40(0.89-2.21) | 0.15 | 0.95(0.61-1.49)  | 0.83 | 0.24 | 1.53(1.09-2.13) | 0.01 | 0.89(0.67-1.19)  | 0.42 | 0.02 |
|            | Dominant   | 1.13(0.60-2.14) | 0.70 | 1.00(0.51-1.94)  | 0.99 | 0.79 | 1.29(0.79-2.12) | 0.31 | 0.57(0.37-0.88)  | 0.01 | 0.02 |
|            | Recessive  | 0.43(0.20-0.92) | 0.03 | 0.86(0.37-1.96)  | 0.71 | 0.23 | 0.66(0.37-1.18) | 0.16 | 0.70(0.40-1.23)  | 0.22 | 0.89 |
| rs6679     | Codominant | 0.82(0.56-1.19) | 0.29 | 0.96(0.62-1.47)  | 0.83 | 0.59 | 0.98(0.73-1.31) | 0.88 | 0.70(0.52-0.94)  | 0.02 | 0.11 |
|            | Dominant   | 1.29(0.71-2.36) | 0.40 | 2.15(0.93-4.96)  | 0.07 | 0.33 | 1.66(1.01-2.73) | 0.04 | 1.11(0.70-1.76)  | 0.66 | 0.24 |
|            | Recessive  | 0.83(0.38-1.80) | 0.64 | 0.54(0.23-1.30)  | 0.17 | 0.47 | 1.31(0.72-2.38) | 0.38 | 0.83(0.50-1.37)  | 0.47 | 0.25 |
| rs11809443 | Codominant | 1.07(0.72-1.57) | 0.75 | 1.07(0.70-1.63)  | 0.77 | 1.00 | 1.35(0.98-1.85) | 0.06 | 0.98(0.74-1.29)  | 0.88 | 0.13 |
|            | Dominant   | 0.82(0.46-1.46) | 0.50 | 1.05(0.53-2.09)  | 0.89 | 0.59 | 0.96(0.61-1.52) | 0.87 | 1.05(0.67-1.64)  | 0.84 | 0.78 |

|           |            |                 |      |                  |      |      |                 |      |                 |      |      |
|-----------|------------|-----------------|------|------------------|------|------|-----------------|------|-----------------|------|------|
|           | Recessive  | 0.23(0.05-1.00) | 0.05 | 2.98(0.68-13.04) | 0.15 | 0.02 | 0.50(0.15-1.66) | 0.25 | 1.84(0.57-5.91) | 0.31 | 0.13 |
|           | Codominant | 0.72(0.46-1.13) | 0.15 | 1.18(0.64-2.18)  | 0.59 | 0.20 | 0.90(0.62-1.30) | 0.56 | 1.10(0.73-1.65) | 0.65 | 0.47 |
| rs2271541 |            |                 |      |                  |      |      |                 |      |                 |      |      |
|           | Dominant   | 0.55(0.32-0.95) | 0.03 | 0.96(0.48-1.91)  | 0.91 | 0.21 | 0.64(0.41-1.02) | 0.06 | 0.70(0.45-1.08) | 0.10 | 0.78 |
|           | Recessive  | 1.77(0.88-3.54) | 0.11 | 0.59(0.21-1.67)  | 0.32 | 0.09 | 1.50(0.85-2.66) | 0.17 | 0.71(0.38-1.32) | 0.28 | 0.08 |
|           | Codominant | 0.87(0.57-1.32) | 0.51 | 0.86(0.53-1.39)  | 0.53 | 0.97 | 0.91(0.64-1.28) | 0.57 | 0.76(0.55-1.04) | 0.08 | 0.45 |
| rs3813521 |            |                 |      |                  |      |      |                 |      |                 |      |      |
|           | Dominant   | 0.47(0.27-0.84) | 0.01 | 0.61(0.31-1.19)  | 0.15 | 0.56 | 0.74(0.47-1.15) | 0.18 | 1.06(0.70-1.62) | 0.77 | 0.25 |
|           | Recessive  | 0.27(0.06-1.17) | 0.08 | 0.26(0.04-1.90)  | 0.18 | 0.98 | 0.55(0.22-1.40) | 0.21 | 1.14(0.57-2.31) | 0.71 | 0.22 |
|           | Codominant | 0.51(0.32-0.83) | 0.01 | 0.61(0.34-1.07)  | 0.08 | 0.64 | 0.75(0.52-1.07) | 0.11 | 1.06(0.78-1.46) | 0.70 | 0.16 |
| rs7897156 |            |                 |      |                  |      |      |                 |      |                 |      |      |
|           | Dominant   | 1.97(1.08-3.57) | 0.03 | 1.02(0.52-1.99)  | 0.96 | 0.15 | 1.54(0.97-2.45) | 0.07 | 0.93(0.60-1.44) | 0.73 | 0.12 |
|           | Recessive  | 2.37(1.11-5.07) | 0.03 | 1.28(0.39-4.22)  | 0.69 | 0.39 | 2.16(1.12-4.14) | 0.02 | 1.56(0.71-3.45) | 0.27 | 0.53 |
|           | Codominant | 1.76(1.17-2.64) | 0.01 | 1.06(0.62-1.79)  | 0.83 | 0.13 | 1.51(1.08-2.12) | 0.02 | 1.03(0.72-1.47) | 0.89 | 0.13 |

<sup>a</sup> Hazard ratios (HRs), 95% confidence intervals (CIs) and corresponding *P*-values were calculated using multivariate Cox proportional hazard models, adjusted for age, gender, smoking status, pathologic stage and adjuvant therapy.

<sup>b</sup>  $P_H$ , *P* for heterogeneity test.

Supplementary Table S3. Primers used in this study

| Assay          | Gene                     | Primers                              |
|----------------|--------------------------|--------------------------------------|
| Promoter assay | rs17583 forward          | 5'-CCGCTCGAGAACCCCTCCCTCTTGCAAGC -3' |
|                | rs17583 reverse          | 5'-CCCAAGCTTGGTCATCCTTCCGCATCTCC -3' |
|                | <i>GLRX3</i> pro forward | 5'-CCGCTCGAGGGACTGAATTGGAAGCACCC-3'  |
|                | <i>GLRX3</i> pro reverse | 5'-CATGCCATGGCGCCAGACAGAAGCAATCCA-3' |
|                | rs4751162 forward        | 5'-CGGGATCCGTGCAAGTCTCCCCATTACC-3'   |
|                | rs4751162 reverse        | 5'-ACGCGTCGACAGACCCAGGCTCCCTAAAAC-3' |
| qRT-PCR        | <i>CAPN1</i> forward     | 5'-ATTTCCAGCTGTGGCAATTT-3'           |
|                | <i>CAPN1</i> reverse     | 5'-CTCCAGAACTCGTTGCCTTC-3'           |
|                | <i>LINC00959</i> forward | 5'-TGCTCCCATCCCTGCCATGT-3'           |
|                | <i>LINC00959</i> reverse | 5'-AAGACAGGAATCTCGGGTGGGC-3'         |
|                | <i>GLRX3</i> forward     | 5'-AGATGAACGAAGTTATGGCAGAG-3'        |
|                | <i>GLRX3</i> reverse     | 5'-ACAGAAAAGTGGGAACAGAGC-3'          |
|                | <i>β-actin</i> forward   | 5'-TTGTTACAGGAAGTCCCTTGCC-3'         |
|                | <i>β-actin</i> reverse   | 5'-ATGCTATCACCTCCCCTGTGT-3'          |
| ChIP-qPCR      | rs17583 forward          | 5'-GATTCTCCCTAGCACCCGCT-3'           |
|                | rs17583 reverse          | 5'-TGCCGGCATAGCCATTCTGG-3'           |
|                | rs4751162 forward        | 5'-TACTCGTCCCCAACACCCA-3'            |
|                | rs4751162 reverse        | 5'-GGCCGAGACTCATTGCAGGA-3'           |
